# Supplementary material
Source: Springer Nature journal article supplement (https://www.springermedizin.de/resource/supplementary/12879_2012_2020_MOESM4_ESM.pdf/9443508)

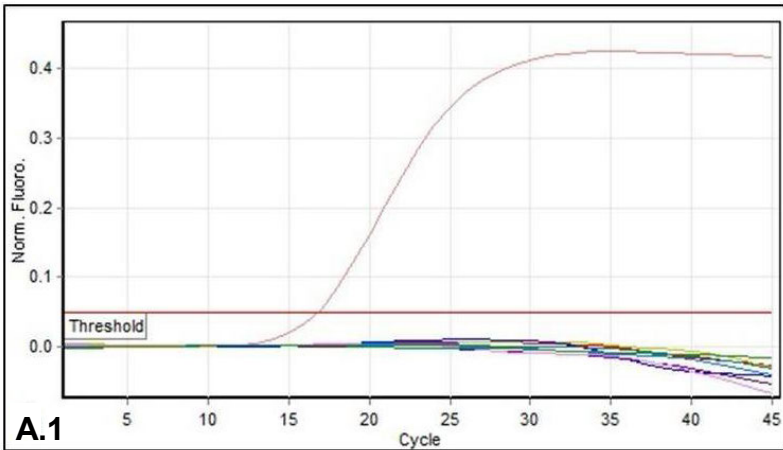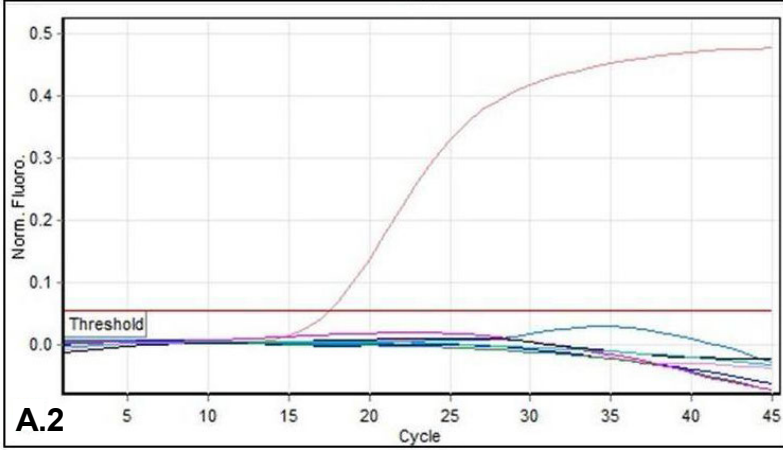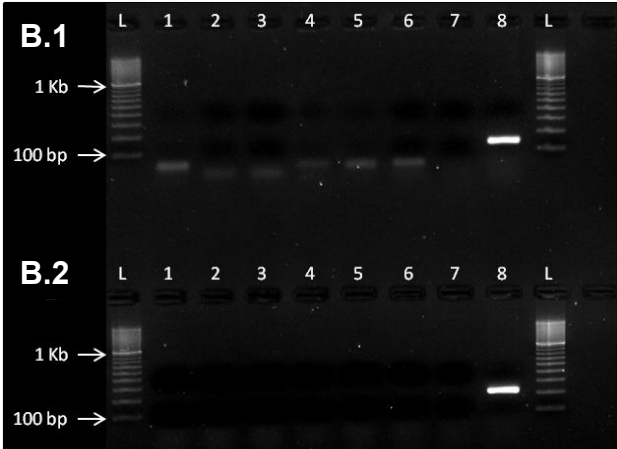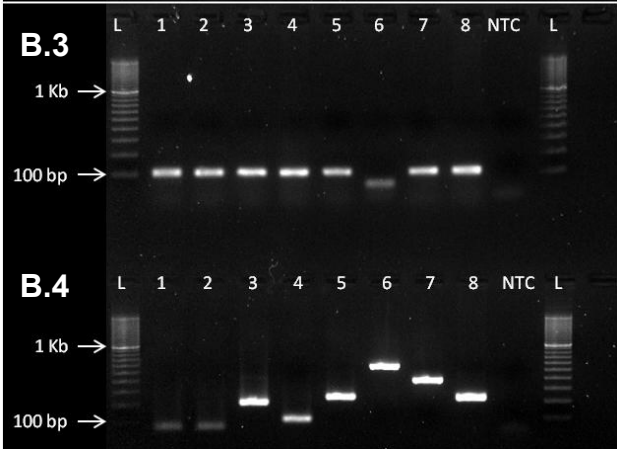

Supplement: MOESM4 [file 9443508]
